# Supplementary material for: Nutritional and Antioxidant Potential of Fiddleheads from European Ferns
Source: PubMed Central journal article supplement (PMC7923283; doi:10.3390/foods10020460), 2021-02-19
Supplement: foods-10-00460-s001.pdf [file foods-10-00460-s001.pdf]

## Supplementary material

Table S1: The list of fern species and reference vegetables whose fiddleheads/young leaves were analysed, and source of plant material collection.

| Species                                       | Family                  | Source of plant material                             |
|-----------------------------------------------|-------------------------|------------------------------------------------------|
| <sup>H</sup> <i>Asplenium scolopendrium</i>   | <i>Aspleniaceae</i>     | Garden centre Krulich                                |
| <i>Athyrium distentifolium</i>                | <i>Athyriaceae</i>      | Fern collection garden in Telč                       |
| <sup>H</sup> <i>Athyrium filix-femina</i>     | <i>Athyriaceae</i>      | Garden centre Krulich                                |
| <sup>W</sup> <i>Pteridium aquilinum</i>       | <i>Dennstaedtiaceae</i> | Wild collection (49°16'13.325 N; 15°22'46.346 E)     |
| <i>Dryopteris aemula</i>                      | <i>Dryopteridaceae</i>  | Fern collection garden in Telč                       |
| <i>Dryopteris affinis</i>                     | <i>Dryopteridaceae</i>  | Fern collection garden in Telč                       |
| <i>Dryopteris borrieri</i>                    | <i>Dryopteridaceae</i>  | Fern collection garden in Telč                       |
| <i>Dryopteris cambrensis</i>                  | <i>Dryopteridaceae</i>  | Fern collection garden in Telč                       |
| <i>Dryopteris carthusiana</i>                 | <i>Dryopteridaceae</i>  | Botanical garden of the Charles University in Prague |
| <i>Dryopteris caucasica</i>                   | <i>Dryopteridaceae</i>  | Fern collection garden in Telč                       |
| <sup>H</sup> <i>Dryopteris dilatata</i>       | <i>Dryopteridaceae</i>  | Garden centre Franc                                  |
| <i>Dryopteris expansa</i>                     | <i>Dryopteridaceae</i>  | Fern collection garden in Telč                       |
| <sup>H</sup> <i>Dryopteris filix-mas</i>      | <i>Dryopteridaceae</i>  | Garden centre Krulich                                |
| <i>Dryopteris oreades</i>                     | <i>Dryopteridaceae</i>  | Fern collection garden in Telč                       |
| <i>Dryopteris remota</i>                      | <i>Dryopteridaceae</i>  | Fern collection garden in Telč                       |
| <sup>H</sup> <i>Polystichum aculeatum</i>     | <i>Dryopteridaceae</i>  | Garden centre Franc                                  |
| <i>Polystichum aculeatum</i>                  | <i>Dryopteridaceae</i>  | Botanical garden of the Charles University in Prague |
| <i>Polystichum setiferum</i>                  | <i>Dryopteridaceae</i>  | Fern collection garden in Telč                       |
| <sup>H</sup> <i>Matteuccia struthiopteris</i> | <i>Onocleaceae</i>      | Garden centre Krulich                                |
| <i>Onoclea sensibilis</i>                     | <i>Onocleaceae</i>      | Botanical garden of the Charles University in Prague |
| <sup>H</sup> <i>Osmunda regalis</i>           | <i>Osmundaceae</i>      | Garden centre Franc                                  |
| <i>Osmunda regalis</i>                        | <i>Osmundaceae</i>      | Botanical garden of the Charles University in Prague |
| <sup>H</sup> <i>Polypodium vulgare</i>        | <i>Polypodiaceae</i>    | Garden centre Franc                                  |
| <i>Polypodium vulgare</i>                     | <i>Polypodiaceae</i>    | Botanical garden of the Charles University in Prague |
| <i>Lastrea limbosperma</i>                    | <i>Thelypteridaceae</i> | Fern collection garden in Telč                       |
| <sup>W</sup> <i>Lastrea limbosperma</i>       | <i>Thelypteridaceae</i> | Wild collection (49°13'14.214"N, 15°33'50.667"E)     |
| <i>Phegopteris connectilis</i>                | <i>Thelypteridaceae</i> | Botanical garden of the Charles University in Prague |
| <i>Thelypteris palustris</i>                  | <i>Thelypteridaceae</i> | Botanical garden of the Charles University in Prague |
| <i>Eruca sativa</i>                           | <i>Brassicaceae</i>     | seedling, SEMO a.s. (Smržice, CZ)                    |
| <i>Spinacia oleracea</i>                      | <i>Amaranthaceae</i>    | seedling, Seva Moravia s.r.o. (Valtice, CZ)          |

<sup>H</sup> = marks horticultural species from garden centres Krulich (Jakub Krulich, Prague, Czech Republic) and Franc (FRANC, Kamenné Žehrovice, Czech Republic) and were cultivated in pots; <sup>W</sup> = marks species collected in the wild, coordinates of the locality are stated in brackets; unmarked fern species were collected in private fern collection garden of RNDr. Libor Ekrt, Ph.D. in Telč (Czech Republic, coordinates: 49°11'19.385"N, 15°27'11.701"E), or in the Botanical Garden Charles University of Prague (Czech Republic, coordinates: 50°4'14.988"N, 14°25'14.621"E).

Table S2: The content of minor xanthophylls in fern fiddleheads analysed by HPLC.

| Species                                       | Neoxanthin<br>( $\mu\text{g}\cdot\text{g}^{-1}$ DW) | Violaxanthin<br>( $\mu\text{g}\cdot\text{g}^{-1}$ DW) | Antheraxanthin<br>( $\mu\text{g}\cdot\text{g}^{-1}$ DW) | Zeaxanthin<br>( $\mu\text{g}\cdot\text{g}^{-1}$ DW) |
|-----------------------------------------------|-----------------------------------------------------|-------------------------------------------------------|---------------------------------------------------------|-----------------------------------------------------|
| <sup>H</sup> <i>Asplenium scolopendrium</i>   | 47.01 ± 3.37                                        | 27.19 ± 1.20                                          | 10.18 ± 0.70                                            | 4.28 ± 0.41 >1.5M                                   |
| <i>Athyrium distentifolium</i>                | 39.43 ± 4.37                                        | 48.60 ± 1.08                                          | 10.77 ± 1.15 >1.5M                                      | 3.85 ± 0.17                                         |
| <sup>H</sup> <i>Athyrium filix-femina</i>     | 54.76 ± 4.18 >1.5M                                  | 34.03 ± 1.87                                          | 7.67 ± 0.16                                             | 3.84 ± 0.26                                         |
| <sup>W</sup> <i>Pteridium aquilinum</i>       | 39.77 ± 3.05                                        | 40.85 ± 3.16                                          | 6.69 ± 0.37                                             | 3.14 ± 0.13                                         |
| <i>Dryopteris aemula</i>                      | 23.04 ± 2.32                                        | 21.86 ± 3.15                                          | 1.16 ± 0.16                                             | 0.43 ± 0.05                                         |
| <i>Dryopteris affinis</i>                     | 22.48 ± 3.06                                        | 20.62 ± 1.17                                          | 2.44 ± 0.30                                             | 2.32 ± 0.25                                         |
| <i>Dryopteris borrieri</i>                    | 23.11 ± 2.12                                        | 29.45 ± 2.92                                          | 0.72 ± 0.18                                             | 1.22 ± 0.21                                         |
| <i>Dryopteris cambrensis</i>                  | 15.38 ± 4.44                                        | 8.73 ± 1.08                                           | 1.11 ± 0.24                                             | 0.79 ± 0.00                                         |
| <i>Dryopteris carthusiana</i>                 | 53.52 ± 5.33 >1.5M                                  | 60.28 ± 7.15 >1.5M                                    | 10.70 ± 2.00 >1.5M                                      | 4.09 ± 0.51 >1.5M                                   |
| <i>Dryopteris caucasica</i>                   | 28.68 ± 2.14                                        | 42.32 ± 1.97                                          | 9.07 ± 0.56                                             | 2.15 ± 0.25                                         |
| <sup>H</sup> <i>Dryopteris dilatata</i>       | 8.38 ± 2.32                                         | 13.73 ± 2.26                                          | 1.40 ± 0.12                                             | 3.38 ± 0.16                                         |
| <i>Dryopteris expansa</i>                     | 27.41 ± 1.51                                        | 26.34 ± 3.18                                          | 1.43 ± 0.16                                             | 1.64 ± 0.13                                         |
| <sup>H</sup> <i>Dryopteris filix-mas</i>      | 52.01 ± 4.87 >1.5M                                  | 14.87 ± 0.49                                          | 1.68 ± 0.26                                             | 3.23 ± 0.58                                         |
| <i>Dryopteris oreades</i>                     | 52.11 ± 2.77 >1.5M                                  | 42.46 ± 1.71                                          | 8.99 ± 0.65                                             | 2.66 ± 0.49                                         |
| <i>Dryopteris remota</i>                      | 17.13 ± 2.75                                        | 18.14 ± 0.82                                          | 5.46 ± 0.31                                             | 2.08 ± 0.29                                         |
| <sup>H</sup> <i>Polystichum aculeatum</i>     | 70.95 ± 6.69 * >1.5M                                | 51.45 ± 4.32 >1.5M                                    | 16.57 ± 1.07 * >1.5M                                    | 3.27 ± 0.37                                         |
| <i>Polystichum aculeatum</i>                  | 53.99 ± 2.50 >1.5M                                  | 43.10 ± 3.22                                          | 6.78 ± 0.60                                             | 2.01 ± 0.66                                         |
| <i>Polystichum setiferum</i>                  | 57.64 ± 5.31 >1.5M                                  | 84.19 ± 1.77 * >1.5M                                  | 12.15 ± 1.39 * >1.5M                                    | 3.02 ± 0.92                                         |
| <sup>H</sup> <i>Matteuccia struthiopteris</i> | 43.62 ± 5.02                                        | 56.91 ± 5.93 >1.5M                                    | 7.55 ± 0.88                                             | 2.54 ± 0.18                                         |
| <i>Onoclea sensibilis</i>                     | 20.51 ± 2.59                                        | 19.28 ± 2.14                                          | 9.52 ± 0.96                                             | 2.23 ± 0.09                                         |
| <sup>H</sup> <i>Osmunda regalis</i>           | 26.54 ± 4.22                                        | 32.06 ± 2.89                                          | 10.28 ± 0.96                                            | 3.56 ± 0.37                                         |
| <i>Osmunda regalis</i>                        | 26.41 ± 1.63                                        | 27.75 ± 1.44                                          | 10.83 ± 0.51 >1.5M                                      | 2.99 ± 1.09                                         |
| <sup>H</sup> <i>Polypodium vulgare</i>        | 52.12 ± 4.90 >1.5M                                  | 40.82 ± 2.84                                          | 3.47 ± 0.11                                             | 1.37 ± 0.32                                         |
| <i>Polypodium vulgare</i>                     | 45.67 ± 2.17                                        | 47.46 ± 2.14                                          | 3.34 ± 0.32                                             | 3.77 ± 0.15                                         |
| <i>Lastrea limbosperma</i>                    | 31.72 ± 1.97                                        | 39.15 ± 1.81                                          | 6.63 ± 0.37                                             | 3.12 ± 0.27                                         |
| <sup>W</sup> <i>Lastrea limbosperma</i>       | 54.46 ± 4.05 >1.5M                                  | 53.65 ± 4.22 >1.5M                                    | 13.02 ± 0.68 * >1.5M                                    | 4.08 ± 0.23 >1.5M                                   |
| <i>Phegopteris connectilis</i>                | 23.59 ± 2.68                                        | 21.69 ± 1.15                                          | 4.34 ± 0.73                                             | 2.26 ± 0.43                                         |
| <i>Thelypteris palustris</i>                  | 25.31 ± 3.49                                        | 27.99 ± 5.40                                          | 5.75 ± 0.46                                             | 2.21 ± 0.23                                         |
| Average of all ferns                          | 37.03 ± 3.42                                        | 35.53 ± 2.59                                          | 6.78 ± 0.58                                             | 2.70 ± 0.33                                         |
| <i>Eruca sativa</i>                           | 41.73 ± 4.20                                        | 42.21 ± 2.57                                          | 12.35 ± 0.89 * >1.5M                                    | 3.72 ± 0.70                                         |
| <i>Spinacia oleracea</i>                      | 14.67 ± 2.68                                        | 4.73 ± 1.71                                           | 2.34 ± 0.40                                             | 0.91 ± 0.11                                         |

<sup>H</sup> marks horticulture species from garden centres, cultivated in pots, <sup>W</sup> marks species collected in wild, unmarked fern species were collected in botanical gardens, \* marks species statistically distinguished from all samples, >1.5M marks values exceeding 1.5 times higher to median value. Anova, Duncan test at  $p \leq 0.05$

Table S3: The average content of individual FAMES in *Aspleniaceae*, *Athyriaceae*, and *Dennstaedtiaceae* fern samples.

| Species/Family                                    | <sup>H</sup> <i>Asplenium scolopendrium</i> | <i>Athyrium distentifolium</i> | <sup>H</sup> <i>Athyrium filix-femina</i> | <sup>W</sup> <i>Pteridium aquilinum</i> |
|---------------------------------------------------|---------------------------------------------|--------------------------------|-------------------------------------------|-----------------------------------------|
| FAME ( $\mu\text{g}\cdot\text{g}^{-1}\text{DW}$ ) | Aspleniaceae                                | Athyriaceae                    | Athyriaceae                               | Dennstaedtiaceae                        |
| 1 Caproic A (C6:0)                                | 22.62 ± 4.63                                | 25.93 ± 0.33                   | 23.62 ± 2.59                              | 15.29 ± 7.60                            |
| 2 Caprylic A (C8:0)                               | 3.29 ± 0.96                                 | 3.31 ± 0.32                    | 3.19 ± 0.54                               | 3.41 ± 0.13                             |
| 3 Capric A (C10:0)                                | 4.39 ± 1.03                                 | 4.41 ± 0.53                    | 4.46 ± 0.72                               | 4.17 ± 0.68                             |
| 4 Lauric A (C12:0)                                | 5.49 ± 0.75                                 | 5.50 ± 0.49                    | 6.14 ± 0.25                               | 5.85 ± 0.77                             |
| 5 Myristoleic A (C14:1n5)                         | 0.00 ± 0.00                                 | 8.86 ± 1.34                    | 9.78 ± 0.02                               | 3.86 ± 5.46                             |
| 6 Myristic A (C14:0)                              | 26.82 ± 1.78                                | 27.34 ± 0.48                   | 21.36 ± 5.80                              | 30.03 ± 1.30                            |
| 7 Pentadecanoic A (C15:0)                         | 32.70 ± 2.25                                | 27.30 ± 0.23                   | 19.05 ± 1.61                              | 15.05 ± 0.05                            |
| 8 Palmitoleic A (C16:1n7)                         | 302.82 ± 23.34                              | 490.41 ± 9.16                  | 475.76 ± 75.72                            | 234.01 ± 3.38                           |
| 9 Palmitic A (C16:0)                              | 1266.89 ± 65.85                             | 1702.06 ± 14.44                | 1743.98 ± 140.88                          | 2092.96 ± 58.48                         |
| 10 cis-10-Heptadecenoic A (C17:1n7)               | 13.73 ± 1.60                                | 18.14 ± 0.38                   | 14.71 ± 1.65                              | 9.84 ± 0.39                             |
| 11 Margaric A (C17:0)                             | 32.67 ± 2.31                                | 39.94 ± 0.17                   | 41.25 ± 3.21                              | 30.46 ± 0.02                            |
| 12 gamma-Linolenic A (C18:3n6)                    | 1191.81 ± 148.93                            | 2147.43 ± 40.00                | 2122.30 ± 157.01                          | 2013.23 ± 41.23                         |
| 13 Linolenic A (C18:3n3)                          | 1217.92 ± 68.05                             | 2886.11 ± 86.90                | 3148.07 ± 214.28                          | 2512.28 ± 43.15                         |
| 14 Linoleic A (C18:2n6c)                          | 3833.94 ± 252.56                            | 4733.47 ± 171.93               | 4929.11 ± 374.99                          | 5904.59 ± 51.63                         |
| 15 Oleic A (C18:1n9c)                             | 2118.44 ± 208.79                            | 3345.88 ± 78.30                | 3042.41 ± 370.75                          | 2937.21 ± 206.44                        |
| 16 Stearic A (C18:0)                              | 54.94 ± 6.55                                | 102.83 ± 2.67                  | 113.46 ± 18.44                            | 189.74 ± 3.78                           |
| 17 Timnodonic A (C20:5n3) - EPA                   | 111.83 ± 11.03                              | 1593.45 ± 217.04               | 548.24 ± 34.09                            | 501.54 ± 88.36                          |
| 18 Arachidonic A (C20:4n6)                        | 3161.12 ± 327.83                            | 3632.39 ± 30.04                | 4673.32 ± 288.23                          | 5649.10 ± 62.58                         |
| 19 DGLA (C20:3n6)                                 | 470.29 ± 54.50                              | 537.30 ± 131.79                | 960.37 ± 61.37                            | 968.97 ± 19.58                          |
| 20 Eicosatrienoic A (C20:3n3) - ETE               | 7.17 ± 2.28                                 | 17.62 ± 1.01                   | 17.45 ± 5.19                              | 8.86 ± 0.06                             |
| 21 Eicosadienoic A (C20:2n6)                      | 27.25 ± 7.11                                | 24.39 ± 0.01                   | 34.12 ± 3.20                              | 48.83 ± 5.26                            |
| 22 Gondoic A (C20:1n9)                            | 68.33 ± 25.80                               | 132.16 ± 0.51                  | 89.04 ± 0.17                              | 88.26 ± 8.62                            |
| 23 Arachidic A (C20:0)                            | 19.67 ± 2.87                                | 46.64 ± 1.20                   | 49.35 ± 5.45                              | 101.14 ± 2.76                           |
| 24 Heneicosanoic A (C21:0)                        | 3.20 ± 0.57                                 | 2.99 ± 0.59                    | 2.84 ± 0.23                               | 2.38 ± 0.28                             |
| 25 Cervonic A (C22:6n3) - DHA                     | 17.66 ± 16.10                               | 18.94 ± 0.86                   | 15.11 ± 12.69                             | 14.94 ± 1.90                            |
| 26 Docosadienoic A (C22:2n6)                      | 4.62 ± 0.77                                 | 7.44 ± 0.59                    | 3.92 ± 0.54                               | 4.49 ± 0.15                             |
| 27 Erucic A (C22:1n9)                             | 15.25 ± 3.42                                | 19.65 ± 6.38                   | 12.60 ± 0.82                              | 11.77 ± 1.47                            |
| 28 Behenic A (C22:0)                              | 235.18 ± 25.94                              | 175.41 ± 4.12                  | 175.85 ± 9.39                             | 408.49 ± 6.08                           |
| 29 Tricosanoic A (C23:0)                          | 12.37 ± 1.85                                | 13.95 ± 0.89                   | 12.76 ± 0.55                              | 9.68 ± 0.29                             |
| 30 Nervonic A (C24:1n9)                           | 271.86 ± 32.95                              | 164.90 ± 2.90                  | 47.60 ± 2.04                              | 13.20 ± 6.76                            |
| 31 Lignoceric A (C24:0)                           | 157.42 ± 18.88                              | 135.24 ± 2.49                  | 165.00 ± 8.83                             | 196.14 ± 3.36                           |

Table S4: The average content of individual FAMES in *Dryopteridaceae* fern samples.

| Species/Family                      | <i>Dryopteris aemula</i> | <i>Dryopteris affinis</i> | <i>Dryopteris borrieri</i> | <i>Dryopteris cambrensis</i> | <i>Dryopteris carthusiana</i> | <i>Dryopteris caucasica</i> | <sup>H</sup> <i>Dryopteris dilatata</i> |
|-------------------------------------|--------------------------|---------------------------|----------------------------|------------------------------|-------------------------------|-----------------------------|-----------------------------------------|
| FAME (µg.g <sup>-1</sup> DW)        | <i>Dryopteridaceae</i>   | <i>Dryopteridaceae</i>    | <i>Dryopteridaceae</i>     | <i>Dryopteridaceae</i>       | <i>Dryopteridaceae</i>        | <i>Dryopteridaceae</i>      | <i>Dryopteridaceae</i>                  |
| 1 Caproic A (C6:0)                  | 25.24 ± 1.57             | 24.18 ± 0.90              | 28.54 ± 3.80               | 25.50 ± 4.27                 | 22.92 ± 0.27                  | 23.16 ± 1.29                | 20.89 ± 1.11                            |
| 2 Caprylic A (C8:0)                 | 3.29 ± 0.11              | 3.13 ± 0.11               | 3.52 ± 0.16                | 5.18 ± 0.35                  | 2.92 ± 0.13                   | 2.78 ± 0.22                 | 2.52 ± 0.22                             |
| 3 Capric A (C10:0)                  | 4.23 ± 0.01              | 4.36 ± 0.06               | 4.36 ± 0.17                | 4.18 ± 0.32                  | 4.03 ± 0.18                   | 3.99 ± 0.27                 | 4.25 ± 0.19                             |
| 4 Lauric A (C12:0)                  | 5.64 ± 0.55              | 5.99 ± 0.30               | 6.52 ± 0.46                | 9.97 ± 0.18                  | 6.09 ± 0.24                   | 5.14 ± 0.61                 | 5.73 ± 0.33                             |
| 5 Myristoleic A (C14:1n5)           | 10.81 ± 0.24             | 8.86 ± 0.13               | 9.96 ± 0.09                | 9.95 ± 0.59                  | 9.87 ± 0.63                   | 10.44 ± 0.49                | 8.29 ± 0.53                             |
| 6 Myristic A (C14:0)                | 23.65 ± 2.31             | 14.16 ± 0.06              | 21.67 ± 0.92               | 14.62 ± 1.15                 | 17.84 ± 0.61                  | 24.01 ± 0.29                | 20.66 ± 0.88                            |
| 7 Pentadecanoic A (C15:0)           | 39.76 ± 1.13             | 20.77 ± 1.26              | 19.17 ± 0.41               | 11.08 ± 9.24                 | 30.60 ± 0.88                  | 31.99 ± 0.69                | 12.83 ± 11.64                           |
| 8 Palmitoleic A (C16:1n7)           | 351.00 ± 366.13          | 388.09 ± 8.15             | 465.11 ± 20.90             | 427.92 ± 26.63               | 461.43 ± 17.24                | 797.43 ± 34.81              | 629.86 ± 23.47                          |
| 9 Palmitic A (C16:0)                | 1770.20 ± 48.70          | 1068.88 ± 67.29           | 1391.46 ± 46.81            | 994.11 ± 82.91               | 1376.87 ± 80.31               | 1792.02 ± 30.30             | 1434.82 ± 87.67                         |
| 10 cis-10-Heptadecenoic A (C17:1n7) | 15.38 ± 0.45             | 18.38 ± 0.45              | 17.34 ± 1.23               | 20.58 ± 0.05                 | 19.28 ± 0.04                  | 18.54 ± 4.16                | 17.97 ± 0.10                            |
| 11 Margaric A (C17:0)               | 46.68 ± 2.54             | 40.73 ± 1.98              | 37.99 ± 1.11               | 40.35 ± 0.07                 | 56.40 ± 3.44                  | 52.50 ± 1.18                | 47.00 ± 1.78                            |
| 12 gamma-Linolenic A (C18:3n6)      | 1618.36 ± 28.13          | 1086.66 ± 34.65           | 1745.97 ± 123.46           | 975.57 ± 78.37               | 1249.67 ± 61.34               | 1770.06 ± 1.88              | 1520.34 ± 46.79                         |
| 13 Linolenic A (C18:3n3)            | 3092.90 ± 50.35          | 1576.83 ± 160.87          | 1984.12 ± 110.11           | 1568.83 ± 106.22             | 2499.51 ± 106.93              | 3416.47 ± 42.60             | 2627.98 ± 38.05                         |
| 14 Linoleic A (C18:2n6c)            | 4744.69 ± 427.05         | 2828.20 ± 19.91           | 3226.28 ± 413.30           | 3232.14 ± 232.06             | 4016.83 ± 79.40               | 5166.56 ± 54.30             | 4046.01 ± 47.68                         |
| 15 Oleic A (C18:1n9c)               | 3651.67 ± 184.02         | 2046.82 ± 20.44           | 2754.73 ± 73.32            | 2203.02 ± 127.30             | 2762.80 ± 79.82               | 4186.26 ± 72.02             | 2795.75 ± 28.23                         |
| 16 Stearic A (C18:0)                | 101.13 ± 3.35            | 69.88 ± 1.19              | 100.92 ± 1.93              | 64.19 ± 9.46                 | 117.07 ± 5.21                 | 142.54 ± 28.55              | 108.21 ± 4.17                           |
| 17 Timnodonic A (C20:5n3) - EPA     | 292.94 ± 45.32           | 381.43 ± 25.41            | 492.38 ± 29.58             | 369.32 ± 51.50               | 490.65 ± 68.95                | 722.25 ± 26.59              | 298.10 ± 9.70                           |
| 18 Arachidonic A (C20:4n6)          | 3762.90 ± 50.61          | 2560.64 ± 164.54          | 3495.40 ± 350.94           | 2514.86 ± 237.70             | 3105.17 ± 53.33               | 4380.75 ± 2.59              | 3330.77 ± 153.57                        |
| 19 DGLA (C20:3n6)                   | 1020.93 ± 12.72          | 570.28 ± 16.31            | 902.07 ± 72.19             | 433.50 ± 22.20               | 1260.01 ± 18.33               | 957.32 ± 34.10              | 1137.34 ± 21.97                         |
| 20 Eicosatrienoic A (C20:3n3) - ETE | 9.65 ± 4.53              | 18.52 ± 7.62              | 14.07 ± 1.39               | 11.33 ± 0.21                 | 19.29 ± 2.25                  | 16.72 ± 3.02                | 13.98 ± 0.79                            |
| 21 Eicosadienoic A (C20:2n6)        | 41.28 ± 17.07            | 30.90 ± 15.39             | 27.47 ± 6.38               | 22.41 ± 3.86                 | 44.62 ± 1.40                  | 42.85 ± 1.94                | 42.55 ± 8.01                            |
| 22 Gondoic A (C20:1n9)              | 119.03 ± 2.17            | 204.13 ± 0.20             | 204.73 ± 8.87              | 227.60 ± 14.46               | 267.45 ± 0.02                 | 241.70 ± 23.93              | 285.80 ± 9.14                           |
| 23 Arachidic A (C20:0)              | 104.81 ± 2.00            | 80.35 ± 2.98              | 94.17 ± 5.94               | 91.66 ± 2.67                 | 215.31 ± 5.67                 | 108.46 ± 5.68               | 110.11 ± 5.30                           |
| 24 Heneicosanoic A (C21:0)          | 4.88 ± 0.09              | 8.17 ± 0.54               | 7.73 ± 0.23                | 8.20 ± 0.03                  | 17.88 ± 0.19                  | 8.92 ± 0.89                 | 7.22 ± 0.22                             |
| 25 Cervonic A (C22:6n3) - DHA       | 23.36 ± 0.16             | 14.55 ± 11.07             | 14.94 ± 11.45              | 13.49 ± 8.81                 | 20.73 ± 19.62                 | 24.45 ± 2.51                | 21.98 ± 0.56                            |
| 26 Docosadienoic A (C22:2n6)        | 4.91 ± 0.61              | 6.32 ± 0.12               | 8.02 ± 0.69                | 7.19 ± 0.90                  | 7.35 ± 0.06                   | 7.23 ± 0.39                 | 8.88 ± 0.85                             |
| 27 Erucic A (C22:1n9)               | 6.50 ± 5.39              | 8.03 ± 5.55               | 9.85 ± 6.66                | 10.11 ± 4.98                 | 18.05 ± 17.28                 | 6.27 ± 0.24                 | 30.98 ± 12.90                           |
| 28 Behenic A (C22:0)                | 170.35 ± 1.58            | 203.78 ± 10.60            | 208.03 ± 12.10             | 162.30 ± 2.93                | 221.14 ± 9.28                 | 221.33 ± 4.63               | 208.86 ± 7.26                           |
| 29 Tricosanoic A (C23:0)            | 11.33 ± 0.39             | 19.43 ± 25.14             | 28.52 ± 1.79               | 17.91 ± 22.40                | 46.28 ± 0.71                  | 38.52 ± 2.48                | 39.57 ± 0.11                            |
| 30 Nervonic A (C24:1n9)             | 224.99 ± 25.02           | 99.13 ± 19.24             | 104.70 ± 9.48              | 69.62 ± 14.96                | 131.51 ± 1.59                 | 151.85 ± 24.12              | 150.76 ± 5.99                           |
| 31 Lignoceric A (C24:0)             | 197.33 ± 1.32            | 150.96 ± 9.72             | 148.39 ± 7.40              | 135.15 ± 0.30                | 138.66 ± 2.97                 | 158.86 ± 5.72               | 157.05 ± 2.36                           |

Table S5: The average content of individual FAMES in *Dryopteridaceae* fern samples.

| Species/Family                      | <i>Dryopteris expansa</i> | <sup>H</sup> <i>Dryopteris filix-mas</i> | <i>Dryopteris oreades</i> | <i>Dryopteris remota</i> | <sup>H</sup> <i>Polystichum aculeatum</i> | <i>Polystichum aculeatum</i> | <i>Polystichum setiferum</i> |
|-------------------------------------|---------------------------|------------------------------------------|---------------------------|--------------------------|-------------------------------------------|------------------------------|------------------------------|
| FAME (µg.g <sup>-1</sup> DW)        | Dryopteridaceae           | Dryopteridaceae                          | Dryopteridaceae           | Dryopteridaceae          | Dryopteridaceae                           | Dryopteridaceae              | Dryopteridaceae              |
| 1 Caproic A (C6:0)                  | 24.20 ± 3.41              | 22.28 ± 0.27                             | 22.85 ± 3.59              | 23.83 ± 2.30             | 22.90 ± 2.35                              | 23.70 ± 4.78                 | 19.93 ± 4.16                 |
| 2 Caprylic A (C8:0)                 | 2.76 ± 0.08               | 2.87 ± 0.21                              | 2.65 ± 0.04               | 5.03 ± 0.08              | 2.52 ± 0.15                               | 3.00 ± 0.06                  | 2.63 ± 0.17                  |
| 3 Capric A (C10:0)                  | 4.23 ± 0.21               | 3.93 ± 0.08                              | 3.84 ± 0.09               | 5.55 ± 0.05              | 3.67 ± 0.07                               | 3.92 ± 0.33                  | 3.84 ± 0.05                  |
| 4 Lauric A (C12:0)                  | 4.99 ± 0.40               | 5.86 ± 0.30                              | 5.15 ± 0.08               | 8.35 ± 0.36              | 5.04 ± 0.02                               | 5.60 ± 0.14                  | 4.97 ± 0.14                  |
| 5 Myristoleic A (C14:1n5)           | 10.37 ± 0.39              | 9.35 ± 0.04                              | 9.41 ± 0.35               | 9.48 ± 0.04              | 8.41 ± 0.21                               | 9.12 ± 0.51                  | 10.54 ± 0.11                 |
| 6 Myristic A (C14:0)                | 24.87 ± 0.68              | 22.39 ± 0.56                             | 17.37 ± 0.19              | 20.51 ± 1.39             | 30.47 ± 0.94                              | 25.05 ± 0.91                 | 35.13 ± 2.40                 |
| 7 Pentadecanoic A (C15:0)           | 27.67 ± 0.62              | 25.45 ± 0.26                             | 11.36 ± 16.06             | 21.69 ± 0.95             | 17.31 ± 0.44                              | 27.52 ± 0.65                 | 18.15 ± 19.48                |
| 8 Palmitoleic A (C16:1n7)           | 1342.11 ± 40.27           | 428.61 ± 3.40                            | 458.82 ± 11.31            | 56.32 ± 0.15             | 393.19 ± 17.90                            | 391.74 ± 19.40               | 475.47 ± 23.54               |
| 9 Palmitic A (C16:0)                | 1914.39 ± 26.40           | 1509.99 ± 87.73                          | 1310.25 ± 4.74            | 1378.95 ± 43.28          | 1783.41 ± 84.70                           | 1392.77 ± 63.79              | 1581.31 ± 130.99             |
| 10 cis-10-Heptadecenoic A (C17:1n7) | 25.36 ± 2.34              | 17.36 ± 0.32                             | 23.72 ± 0.58              | 15.83 ± 0.30             | 13.69 ± 0.86                              | 12.00 ± 0.14                 | 13.35 ± 1.06                 |
| 11 Margaric A (C17:0)               | 60.19 ± 7.18              | 49.28 ± 0.44                             | 49.19 ± 1.97              | 37.55 ± 1.66             | 43.49 ± 1.11                              | 36.24 ± 2.73                 | 49.35 ± 2.01                 |
| 12 gamma-Linolenic A (C18:3n6)      | 2622.62 ± 37.60           | 1614.35 ± 141.59                         | 1536.95 ± 35.13           | 1581.63 ± 53.65          | 1916.90 ± 87.61                           | 1077.47 ± 75.33              | 1575.75 ± 167.97             |
| 13 Linolenic A (C18:3n3)            | 4461.73 ± 22.81           | 2961.72 ± 172.74                         | 2716.36 ± 114.10          | 1963.78 ± 2.78           | 3721.08 ± 155.08                          | 1965.81 ± 130.02             | 2767.26 ± 150.70             |
| 14 Linoleic A (C18:2n6c)            | 5008.30 ± 6.33            | 4167.96 ± 170.78                         | 4628.72 ± 90.34           | 4196.43 ± 769.50         | 4299.44 ± 433.75                          | 4130.62 ± 704.55             | 4064.88 ± 304.11             |
| 15 Oleic A (C18:1n9c)               | 4826.76 ± 147.86          | 3030.56 ± 126.34                         | 2975.79 ± 33.72           | 2447.19 ± 38.83          | 3424.16 ± 20.39                           | 2377.88 ± 221.31             | 3097.68 ± 327.94             |
| 16 Stearic A (C18:0)                | 147.68 ± 0.51             | 119.35 ± 3.53                            | 91.97 ± 13.03             | 92.80 ± 5.83             | 107.20 ± 11.86                            | 134.84 ± 1.51                | 88.07 ± 117.05               |
| 17 Timnodonic A (C20:5n3) - EPA     | 962.06 ± 37.00            | 322.78 ± 34.22                           | 206.09 ± 11.39            | 545.17 ± 50.21           | 330.11 ± 9.63                             | 211.04 ± 9.78                | 315.10 ± 40.39               |
| 18 Arachidonic A (C20:4n6)          | 4890.14 ± 176.99          | 3301.80 ± 107.90                         | 3351.06 ± 86.70           | 3322.04 ± 43.81          | 4603.39 ± 90.13                           | 3743.65 ± 185.25             | 4009.64 ± 366.05             |
| 19 DGLA (C20:3n6)                   | 1771.26 ± 59.35           | 977.81 ± 73.03                           | 741.07 ± 43.94            | 746.05 ± 0.84            | 955.85 ± 85.02                            | 889.94 ± 55.85               | 851.87 ± 136.70              |
| 20 Eicosatrienoic A (C20:3n3) - ETE | 32.28 ± 1.01              | 15.69 ± 0.60                             | 16.31 ± 0.43              | 15.65 ± 0.93             | 8.33 ± 1.15                               | 14.04 ± 0.71                 | 14.70 ± 1.69                 |
| 21 Eicosadienoic A (C20:2n6)        | 54.67 ± 3.09              | 72.79 ± 0.14                             | 33.41 ± 0.11              | 83.61 ± 1.67             | 68.35 ± 2.39                              | 58.78 ± 0.13                 | 65.75 ± 3.67                 |
| 22 Gondoic A (C20:1n9)              | 390.05 ± 66.61            | 187.19 ± 9.81                            | 158.29 ± 14.37            | 269.65 ± 30.03           | 441.60 ± 9.85                             | 291.29 ± 73.73               | 398.10 ± 5.50                |
| 23 Arachidic A (C20:0)              | 224.89 ± 11.89            | 90.75 ± 2.03                             | 89.24 ± 1.79              | 92.77 ± 2.71             | 170.12 ± 3.54                             | 223.39 ± 7.86                | 234.17 ± 5.84                |
| 24 Heneicosanoic A (C21:0)          | 11.93 ± 0.52              | 8.51 ± 0.32                              | 7.51 ± 0.38               | 7.87 ± 0.32              | 7.48 ± 0.30                               | 9.35 ± 0.39                  | 10.39 ± 0.59                 |
| 25 Cervonic A (C22:6n3) - DHA       | 25.32 ± 0.11              | 21.69 ± 1.68                             | 18.75 ± 0.81              | 26.41 ± 0.50             | 30.03 ± 0.12                              | 29.71 ± 2.09                 | 16.93 ± 14.47                |
| 26 Docosadienoic A (C22:2n6)        | 14.00 ± 0.91              | 6.49 ± 0.03                              | 5.10 ± 0.34               | 6.51 ± 0.27              | 6.76 ± 0.08                               | 6.12 ± 0.23                  | 10.62 ± 0.16                 |
| 27 Erucic A (C22:1n9)               | 24.49 ± 0.75              | 22.20 ± 0.75                             | 7.03 ± 4.56               | 9.11 ± 5.22              | 11.58 ± 3.82                              | 9.53 ± 1.63                  | 16.69 ± 4.96                 |
| 28 Behenic A (C22:0)                | 304.12 ± 11.84            | 172.17 ± 1.71                            | 183.30 ± 7.67             | 190.18 ± 4.52            | 361.05 ± 7.50                             | 369.25 ± 7.41                | 466.73 ± 27.72               |
| 29 Tricosanoic A (C23:0)            | 52.57 ± 4.28              | 18.77 ± 23.95                            | 30.51 ± 1.48              | 34.44 ± 1.34             | 19.65 ± 0.62                              | 21.47 ± 0.39                 | 17.46 ± 0.62                 |
| 30 Nervonic A (C24:1n9)             | 313.15 ± 5.54             | 96.88 ± 44.77                            | 132.15 ± 65.17            | 123.95 ± 29.44           | 6.43 ± 0.09                               | 46.77 ± 26.51                | 122.83 ± 88.42               |
| 31 Lignoceric A (C24:0)             | 178.00 ± 5.89             | 137.43 ± 2.00                            | 140.21 ± 5.30             | 132.10 ± 1.55            | 174.79 ± 3.55                             | 146.93 ± 1.94                | 123.28 ± 7.40                |

Table S6: The average content of individual FAMES in *Onocleaceae*, *Osmundaceae*, and *Polypodiaceae* fern samples.

| Species/Family<br>FAME ( $\mu\text{g}\cdot\text{g}^{-1}\text{DW}$ ) | <sup>13</sup> C-Matteuccia<br><i>struthiopteris</i><br><i>Onocleaceae</i> | <i>Onoclea sensibilis</i><br><i>Onocleaceae</i> | <sup>13</sup> C-Osmunda<br><i>regalis</i><br><i>Osmundaceae</i> | <i>Osmunda regalis</i><br><i>Osmundaceae</i> | <sup>13</sup> C-Polypodium<br><i>vulgare</i><br><i>Polypodiaceae</i> | <i>Polypodium vulgare</i><br><i>Polypodiaceae</i> |
|---------------------------------------------------------------------|---------------------------------------------------------------------------|-------------------------------------------------|-----------------------------------------------------------------|----------------------------------------------|----------------------------------------------------------------------|---------------------------------------------------|
| 1 Caproic A (C6:0)                                                  | 18.83 ± 0.27                                                              | 19.22 ± 2.86                                    | 16.41 ± 0.38                                                    | 16.40 ± 1.42                                 | 19.33 ± 0.45                                                         | 18.65 ± 7.75                                      |
| 2 Caprylic A (C8:0)                                                 | 2.86 ± 0.01                                                               | 0.00 ± 0.00                                     | 0.00 ± 0.00                                                     | 0.00 ± 0.00                                  | 2.68 ± 0.05                                                          | 2.87 ± 0.14                                       |
| 3 Capric A (C10:0)                                                  | 4.25 ± 0.24                                                               | 3.65 ± 0.47                                     | 3.96 ± 0.01                                                     | 5.66 ± 0.13                                  | 0.00 ± 0.00                                                          | 0.00 ± 0.00                                       |
| 4 Lauric A (C12:0)                                                  | 7.29 ± 0.65                                                               | 5.59 ± 0.65                                     | 5.13 ± 0.17                                                     | 5.00 ± 0.00                                  | 7.53 ± 1.29                                                          | 6.37 ± 0.04                                       |
| 5 Myristoleic A (C14:1n5)                                           | 8.57 ± 1.24                                                               | 8.21 ± 1.09                                     | 8.02 ± 0.11                                                     | 7.94 ± 0.25                                  | 8.20 ± 0.12                                                          | 8.31 ± 0.49                                       |
| 6 Myristic A (C14:0)                                                | 17.81 ± 2.08                                                              | 16.75 ± 0.90                                    | 11.63 ± 0.20                                                    | 12.38 ± 0.16                                 | 21.06 ± 1.96                                                         | 17.42 ± 0.07                                      |
| 7 Pentadecanoic A (C15:0)                                           | 23.26 ± 2.78                                                              | 23.29 ± 1.58                                    | 12.03 ± 0.28                                                    | 11.28 ± 0.66                                 | 10.57 ± 0.38                                                         | 11.46 ± 0.69                                      |
| 8 Palmitoleic A (C16:1n7)                                           | 914.86 ± 66.06                                                            | 394.63 ± 28.03                                  | 254.59 ± 9.53                                                   | 190.15 ± 44.23                               | 447.69 ± 24.76                                                       | 402.57 ± 1.08                                     |
| 9 Palmitic A (C16:0)                                                | 1934.22 ± 194.62                                                          | 1713.89 ± 111.30                                | 2043.22 ± 88.67                                                 | 2040.07 ± 1.77                               | 1944.43 ± 62.83                                                      | 1495.08 ± 41.73                                   |
| 10 cis-10-Heptadecenoic A (C17:1n7)                                 | 18.39 ± 1.21                                                              | 13.47 ± 1.31                                    | 12.66 ± 0.60                                                    | 10.99 ± 0.33                                 | 15.35 ± 1.06                                                         | 14.53 ± 0.66                                      |
| 11 Margaric A (C17:0)                                               | 41.30 ± 0.43                                                              | 48.91 ± 4.92                                    | 46.83 ± 2.69                                                    | 36.60 ± 2.24                                 | 43.97 ± 4.00                                                         | 32.22 ± 0.44                                      |
| 12 gamma-Linolenic A (C18:3n6)                                      | 2151.42 ± 116.45                                                          | 1502.98 ± 145.41                                | 1097.34 ± 76.36                                                 | 1055.16 ± 34.78                              | 2572.32 ± 81.77                                                      | 1331.11 ± 54.25                                   |
| 13 Linolenic A (C18:3n3)                                            | 3345.94 ± 356.72                                                          | 2434.59 ± 50.21                                 | 4149.79 ± 260.63                                                | 4118.78 ± 73.57                              | 3800.96 ± 236.30                                                     | 2341.05 ± 120.30                                  |
| 14 Linoleic A (C18:2n6c)                                            | 4595.90 ± 347.18                                                          | 4868.95 ± 258.67                                | 3834.53 ± 236.71                                                | 2791.62 ± 125.57                             | 7173.74 ± 141.34                                                     | 7250.33 ± 78.88                                   |
| 15 Oleic A (C18:1n9c)                                               | 3023.33 ± 301.78                                                          | 2697.63 ± 264.53                                | 2784.61 ± 161.65                                                | 2591.18 ± 1.20                               | 4568.90 ± 137.67                                                     | 3810.06 ± 23.40                                   |
| 16 Stearic A (C18:0)                                                | 155.70 ± 15.78                                                            | 149.77 ± 0.11                                   | 152.20 ± 31.37                                                  | 139.76 ± 46.21                               | 140.39 ± 5.32                                                        | 102.09 ± 4.03                                     |
| 17 Timnodonic A (C20:5n3) - EPA                                     | 1828.21 ± 366.38                                                          | 397.97 ± 52.53                                  | 999.17 ± 2.08                                                   | 1193.46 ± 232.08                             | 154.39 ± 49.24                                                       | 103.25 ± 4.99                                     |
| 18 Arachidonic A (C20:4n6)                                          | 4301.51 ± 391.83                                                          | 3709.38 ± 192.89                                | 2678.83 ± 27.10                                                 | 2296.72 ± 174.62                             | 6257.19 ± 176.28                                                     | 5260.76 ± 136.99                                  |
| 19 DGLA (C20:3n6)                                                   | 1152.59 ± 15.60                                                           | 719.23 ± 48.03                                  | 630.18 ± 77.91                                                  | 573.84 ± 52.57                               | 1688.38 ± 30.14                                                      | 1103.08 ± 53.52                                   |
| 20 Eicosatrienoic A (C20:3n3) - ETE                                 | 42.76 ± 1.78                                                              | 15.64 ± 1.10                                    | 30.80 ± 0.26                                                    | 25.70 ± 0.88                                 | 26.91 ± 1.61                                                         | 21.30 ± 0.32                                      |
| 21 Eicosadienoic A (C20:2n6)                                        | 47.25 ± 4.31                                                              | 56.12 ± 1.49                                    | 35.84 ± 1.14                                                    | 55.41 ± 5.23                                 | 77.34 ± 1.29                                                         | 81.18 ± 1.72                                      |
| 22 Gondoic A (C20:1n9)                                              | 113.84 ± 6.15                                                             | 112.30 ± 2.00                                   | 69.62 ± 8.48                                                    | 56.85 ± 4.00                                 | 85.38 ± 38.18                                                        | 43.65 ± 0.89                                      |
| 23 Arachidic A (C20:0)                                              | 46.00 ± 10.25                                                             | 48.23 ± 3.85                                    | 41.29 ± 7.53                                                    | 12.81 ± 15.91                                | 166.94 ± 13.56                                                       | 97.41 ± 8.35                                      |
| 24 Heneicosanoic A (C21:0)                                          | 2.97 ± 0.26                                                               | 2.40 ± 0.39                                     | 3.59 ± 0.44                                                     | 2.35 ± 0.08                                  | 3.96 ± 0.54                                                          | 3.21 ± 0.08                                       |
| 25 Cervonic A (C22:6n3) - DHA                                       | 35.39 ± 5.93                                                              | 26.32 ± 2.32                                    | 12.52 ± 0.29                                                    | 11.91 ± 0.15                                 | 10.80 ± 4.21                                                         | 21.92 ± 20.06                                     |
| 26 Docosadienoic A (C22:2n6)                                        | 8.63 ± 0.23                                                               | 2.41 ± 0.14                                     | 2.85 ± 0.07                                                     | 1.83 ± 0.14                                  | 3.13 ± 0.58                                                          | 2.47 ± 0.68                                       |
| 27 Erucic A (C22:1n9)                                               | 16.61 ± 7.73                                                              | 5.95 ± 1.17                                     | 4.20 ± 0.34                                                     | 3.41 ± 0.87                                  | 3.78 ± 0.71                                                          | 3.10 ± 0.24                                       |
| 28 Behenic A (C22:0)                                                | 177.74 ± 8.64                                                             | 137.88 ± 6.64                                   | 203.90 ± 7.89                                                   | 171.45 ± 25.93                               | 233.97 ± 11.01                                                       | 177.03 ± 11.10                                    |
| 29 Tricosanoic A (C23:0)                                            | 13.01 ± 0.82                                                              | 11.21 ± 0.48                                    | 17.12 ± 0.25                                                    | 11.89 ± 0.42                                 | 6.91 ± 0.42                                                          | 6.59 ± 0.51                                       |
| 30 Nervonic A (C24:1n9)                                             | 22.38 ± 7.36                                                              | 39.20 ± 1.63                                    | 19.24 ± 16.63                                                   | 8.80 ± 4.15                                  | 68.65 ± 12.13                                                        | 9.49 ± 5.75                                       |
| 31 Lignoceric A (C24:0)                                             | 142.94 ± 6.98                                                             | 166.55 ± 8.53                                   | 99.00 ± 4.52                                                    | 85.80 ± 4.04                                 | 123.56 ± 4.09                                                        | 112.40 ± 5.28                                     |

Table S7: The average content of individual FAMES in *Thelypteridaceae* fern samples and samples of reference vegetables.

| Species/Family<br>FAME ( $\mu\text{g}\cdot\text{g}^{-1}\text{DW}$ ) | <i>Lastrea limbosperma</i><br>Thelypteridaceae | <sup>w</sup> <i>Lastrea limbosperma</i><br>Thelypteridaceae | <i>Phegopteris connectilis</i><br>Thelypteridaceae | <i>Thelypteris palustris</i><br>Thelypteridaceae | <i>Eruca sativa</i><br>Brassicaceae | <i>Spinacia oleracea</i><br>Amaranthaceae |
|---------------------------------------------------------------------|------------------------------------------------|-------------------------------------------------------------|----------------------------------------------------|--------------------------------------------------|-------------------------------------|-------------------------------------------|
| 1 Caproic A (C6:0)                                                  | 22.11 ± 0.05                                   | 20.40 ± 0.30                                                | 16.62 ± 7.18                                       | 25.53 ± 0.42                                     | 14.00 ± 5.90                        | 14.37 ± 2.65                              |
| 2 Caprylic A (C8:0)                                                 | 2.49 ± 0.15                                    | 2.63 ± 0.14                                                 | 2.94 ± 0.19                                        | 2.66 ± 0.07                                      | 3.94 ± 0.00                         | 1.34 ± 1.90                               |
| 3 Capric A (C10:0)                                                  | 4.29 ± 0.19                                    | 4.39 ± 0.30                                                 | 3.92 ± 0.22                                        | 3.91 ± 0.01                                      | 4.72 ± 0.05                         | 3.62 ± 0.06                               |
| 4 Lauric A (C12:0)                                                  | 5.48 ± 0.28                                    | 5.90 ± 0.02                                                 | 6.08 ± 0.29                                        | 7.41 ± 0.13                                      | 20.21 ± 0.70                        | 8.28 ± 3.03                               |
| 5 Myristoleic A (C14:1n5)                                           | 9.25 ± 0.42                                    | 9.30 ± 0.85                                                 | 8.78 ± 0.57                                        | 9.62 ± 0.39                                      | 7.59 ± 1.13                         | 7.59 ± 0.80                               |
| 6 Myristic A (C14:0)                                                | 28.03 ± 1.22                                   | 23.96 ± 0.50                                                | 31.94 ± 0.95                                       | 61.53 ± 2.26                                     | 21.51 ± 1.40                        | 19.07 ± 12.36                             |
| 7 Pentadecanoic A (C15:0)                                           | 19.97 ± 1.54                                   | 25.67 ± 1.75                                                | 18.18 ± 0.35                                       | 16.08 ± 0.84                                     | 17.33 ± 0.36                        | 26.25 ± 18.32                             |
| 8 Palmitoleic A (C16:1n7)                                           | 385.51 ± 7.75                                  | 499.34 ± 34.66                                              | 368.08 ± 14.65                                     | 288.52 ± 337.40                                  | 233.95 ± 24.06                      | 187.69 ± 120.78                           |
| 9 Palmitic A (C16:0)                                                | 1748.64 ± 20.21                                | 2072.57 ± 19.63                                             | 2252.86 ± 50.75                                    | 2015.77 ± 80.90                                  | 1274.59 ± 36.99                     | 948.87 ± 684.67                           |
| 10 cis-10-Heptadecenoic A (C17:1n7)                                 | 15.04 ± 0.39                                   | 16.86 ± 0.96                                                | 13.64 ± 1.19                                       | 17.62 ± 0.50                                     | 18.36 ± 2.12                        | 9.88 ± 5.64                               |
| 11 Margaric A (C17:0)                                               | 34.33 ± 0.02                                   | 55.88 ± 1.47                                                | 46.33 ± 1.47                                       | 40.84 ± 3.54                                     | 107.42 ± 8.91                       | 28.06 ± 18.54                             |
| 12 gamma-Linolenic A (C18:3n6)                                      | 1503.95 ± 47.09                                | 1860.09 ± 29.16                                             | 1390.92 ± 3.31                                     | 1451.32 ± 112.91                                 | 0.00 ± 0.00                         | 0.00 ± 0.00                               |
| 13 Linolenic A (C18:3n3)                                            | 2945.97 ± 30.17                                | 4753.61 ± 225.91                                            | 3510.88 ± 81.19                                    | 3274.88 ± 17.96                                  | 7008.02 ± 372.76                    | 5771.87 ± 3635.94                         |
| 14 Linoleic A (C18:2n6c)                                            | 4153.07 ± 37.70                                | 4672.86 ± 47.90                                             | 6553.86 ± 339.72                                   | 5609.10 ± 388.22                                 | 2658.57 ± 332.03                    | 1973.00 ± 1328.28                         |
| 15 Oleic A (C18:1n9c)                                               | 2741.55 ± 53.51                                | 3593.72 ± 160.56                                            | 3782.75 ± 109.63                                   | 3763.88 ± 88.66                                  | 1803.48 ± 77.94                     | 1487.75 ± 1234.62                         |
| 16 Stearic A (C18:0)                                                | 123.28 ± 0.97                                  | 160.42 ± 14.04                                              | 350.07 ± 3.50                                      | 144.53 ± 23.87                                   | 235.63 ± 9.41                       | 92.56 ± 53.96                             |
| 17 Timnodonic A (C20:5n3) - EPA                                     | 501.09 ± 12.72                                 | 726.05 ± 1.45                                               | 514.72 ± 112.63                                    | 1155.03 ± 24.66                                  | 0.00 ± 0.00                         | 0.00 ± 0.00                               |
| 18 Arachidonic A (C20:4n6)                                          | 3755.09 ± 85.45                                | 3742.90 ± 83.03                                             | 4434.28 ± 134.55                                   | 3719.77 ± 230.97                                 | 5.17 ± 0.24                         | 7.10 ± 0.84                               |
| 19 DGLA (C20:3n6)                                                   | 640.94 ± 39.07                                 | 575.70 ± 41.86                                              | 638.49 ± 40.60                                     | 724.66 ± 67.98                                   | 0.00 ± 0.00                         | 0.00 ± 0.00                               |
| 20 Eicosatrienoic A (C20:3n3) - ETE                                 | 13.77 ± 0.27                                   | 14.49 ± 0.48                                                | 12.00 ± 0.88                                       | 27.20 ± 1.13                                     | 48.84 ± 0.53                        | 18.30 ± 10.40                             |
| 21 Eicosadienoic A (C20:2n6)                                        | 43.96 ± 1.30                                   | 24.63 ± 1.86                                                | 61.85 ± 5.70                                       | 51.44 ± 12.93                                    | 19.71 ± 0.38                        | 7.06 ± 1.65                               |
| 22 Gondoic A (C20:1n9)                                              | 89.92 ± 2.35                                   | 124.74 ± 16.23                                              | 99.33 ± 30.89                                      | 111.18 ± 28.50                                   | 42.97 ± 8.22                        | 66.14 ± 35.91                             |
| 23 Arachidic A (C20:0)                                              | 55.00 ± 18.56                                  | 101.37 ± 1.27                                               | 261.10 ± 10.80                                     | 71.22 ± 22.26                                    | 26.12 ± 0.26                        | 26.94 ± 18.83                             |
| 24 Heneicosanoic A (C21:0)                                          | 4.66 ± 0.20                                    | 4.63 ± 0.11                                                 | 3.85 ± 0.25                                        | 3.70 ± 0.24                                      | 2.72 ± 0.17                         | 3.76 ± 1.73                               |
| 25 Cervonic A (C22:6n3) - DHA                                       | 12.65 ± 0.40                                   | 17.88 ± 1.32                                                | 14.60 ± 10.68                                      | 15.40 ± 0.36                                     | 19.33 ± 16.31                       | 7.41 ± 2.83                               |
| 26 Docosadienoic A (C22:2n6)                                        | 9.40 ± 0.18                                    | 14.34 ± 1.91                                                | 12.77 ± 1.46                                       | 5.35 ± 0.14                                      | 5.21 ± 0.92                         | 2.51 ± 0.88                               |
| 27 Erucic A (C22:1n9)                                               | 32.00 ± 0.82                                   | 59.38 ± 4.31                                                | 14.83 ± 3.10                                       | 15.20 ± 2.85                                     | 11.98 ± 2.17                        | 3.21 ± 2.15                               |
| 28 Behenic A (C22:0)                                                | 437.96 ± 9.32                                  | 437.95 ± 23.43                                              | 642.81 ± 29.26                                     | 444.85 ± 51.78                                   | 110.30 ± 3.45                       | 51.52 ± 36.53                             |
| 29 Tricosanoic A (C23:0)                                            | 13.77 ± 0.70                                   | 11.34 ± 0.52                                                | 15.43 ± 0.76                                       | 12.94 ± 1.10                                     | 25.22 ± 0.18                        | 7.66 ± 5.02                               |
| 30 Nervonic A (C24:1n9)                                             | 113.60 ± 18.28                                 | 187.80 ± 50.37                                              | 24.01 ± 0.06                                       | 51.77 ± 3.31                                     | 55.39 ± 15.52                       | 0.00 ± 0.00                               |
| 31 Lignoceric A (C24:0)                                             | 154.13 ± 5.93                                  | 144.05 ± 5.26                                               | 302.49 ± 12.48                                     | 154.30 ± 20.52                                   | 341.84 ± 1.07                       | 52.20 ± 37.38                             |
